# Supplementary material for: Fast detection of de novo copy number variants from SNP arrays for case-parent trios
Source: Springer Nature journal article supplement (doi:10.1186/1471-2105-13-330), 2012-12-01
Supplement: 12859_2011_5674_MOESM3_ESM.pdf [file 12859_2011_5674_MOESM3_ESM.pdf]

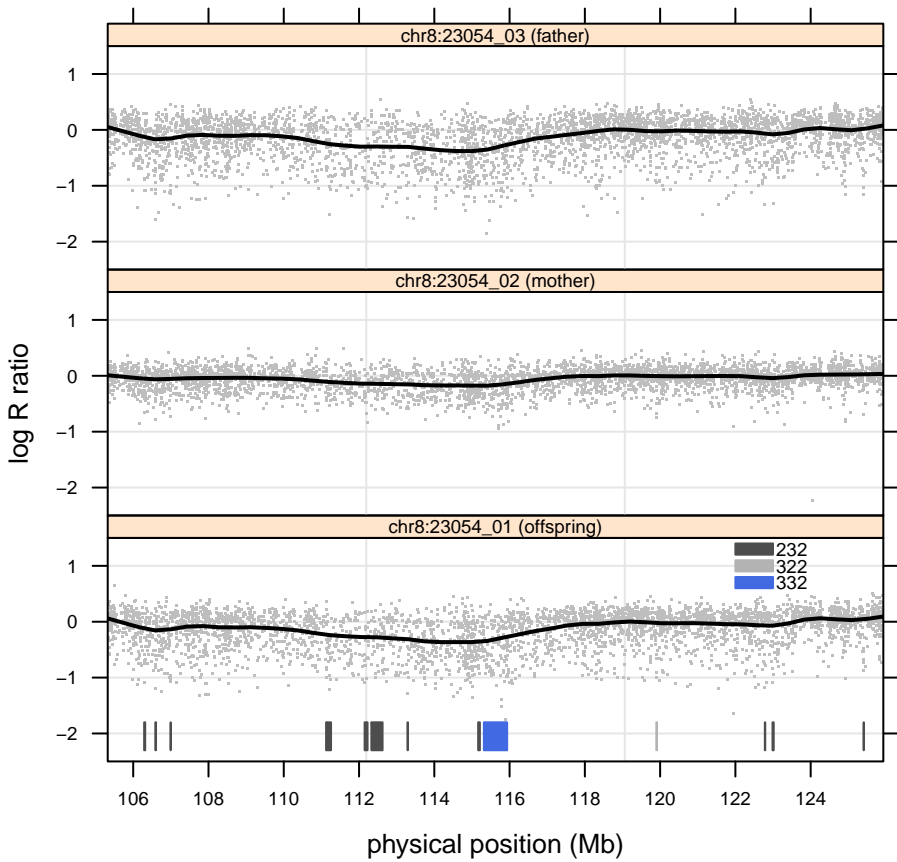

(a)

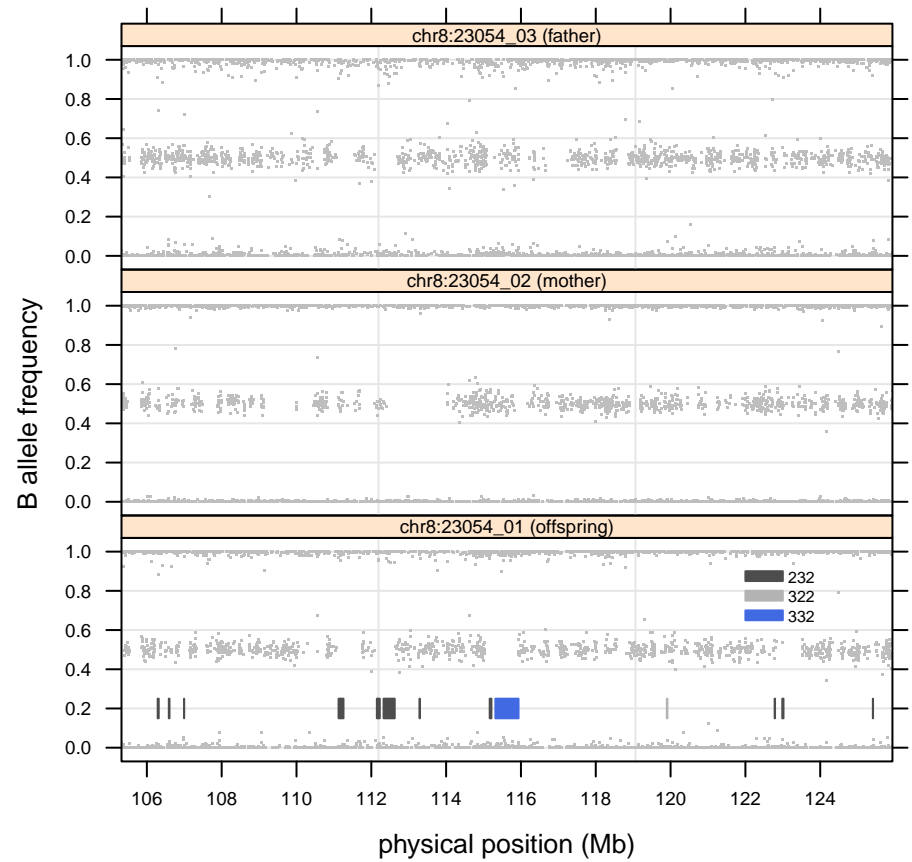

(b)

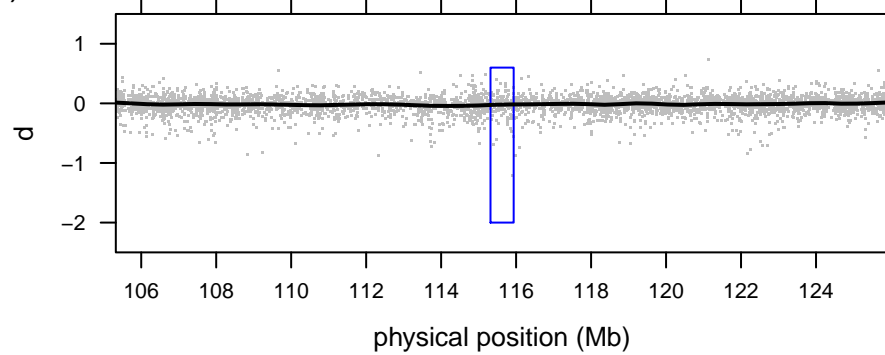

(c)
